# Supplementary material for: Fostering Spatial Efficiency in the Marine Space, in a Socially Sustainable Way: Lessons Learnt From a Soft Multi-Use Assessment in the Mediterranean
Source: Frontiers journal article supplement (doi:10.3389/fmars.2021.613721), 2021-03-22
Supplement: Table_2.docx [file Table_2.docx]

| **Table 2.** Results of D.A.B.I. Analysis: **Added-values**  **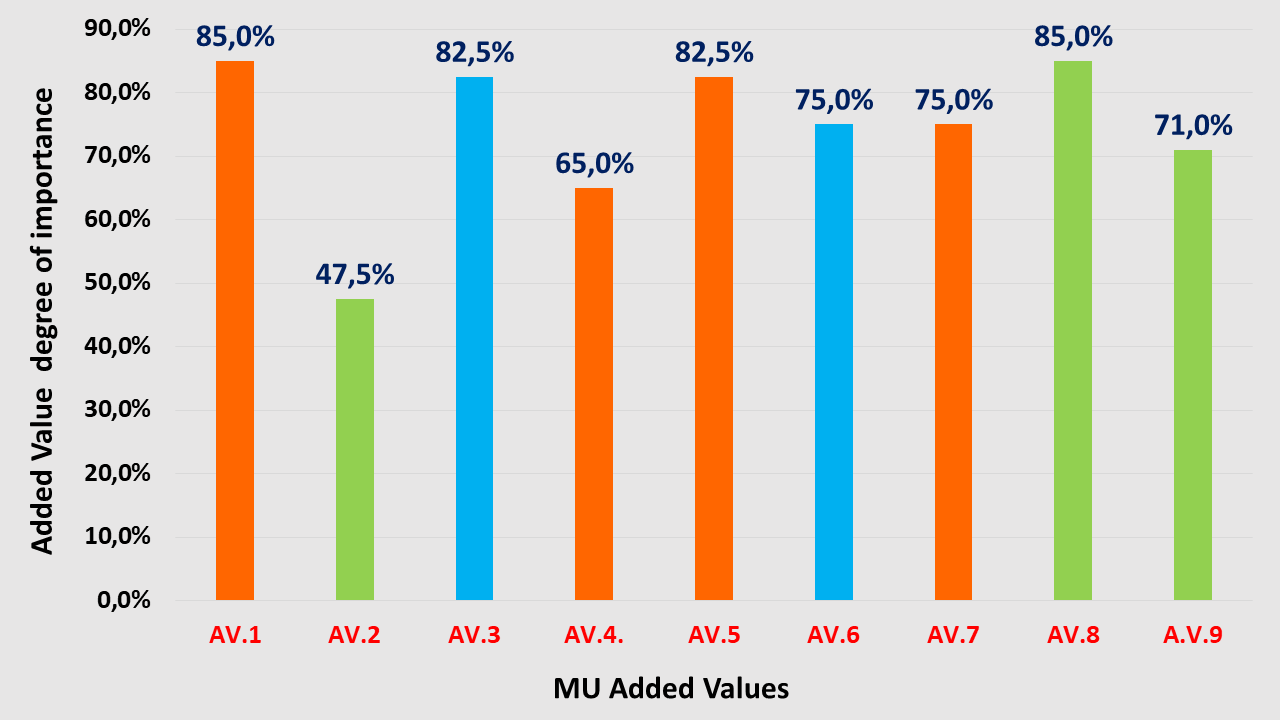** | **Added Values from “Fisheries-Tourism-Nature Conservation” MU in Greece**  **AV.1** Diversification of traditional fishing activities and increase of fishers’ income **(Ec).**  **AV.2** Opportunity for the already reduced fish stocks to recover, following reduction of the fishing effort **(Env).**  **AV.3** Increase of employment and social coherence in coastal and insular communities depending on fisheries **(S).**  **AV.4.** Attracting and maintaining young people in the fisher’s profession **(Ec).**  **AV.5** Attraction of visitors seeking authentic experiences - development of niche tourism markets **(Ec).**  **AV.6** Major role of fishers in safeguarding and promoting their cultural identity **(S).**  **AV.7** Promotion of branded local agricultural products **(Ec).**  **AV.8** Raising awareness of tourists on issues related to the negative environmental impact of fishing (e.g. ghost fishing) **(Env).**  **A.V.9** Further involvement of SSF vessels in environmental activities **(Env.)**  **S=Social, Ec=Economic, P=Political, Env=Environmental, T=Technological** |
| --- | --- |
