# Supplementary material for: Fostering Spatial Efficiency in the Marine Space, in a Socially Sustainable Way: Lessons Learnt From a Soft Multi-Use Assessment in the Mediterranean
Source: Frontiers journal article supplement (doi:10.3389/fmars.2021.613721), 2021-03-22
Supplement: Table_3.docx [file Table_3.docx]

| **Table 3.** Results of D.A.B.I. Analysis, **Barriers**  **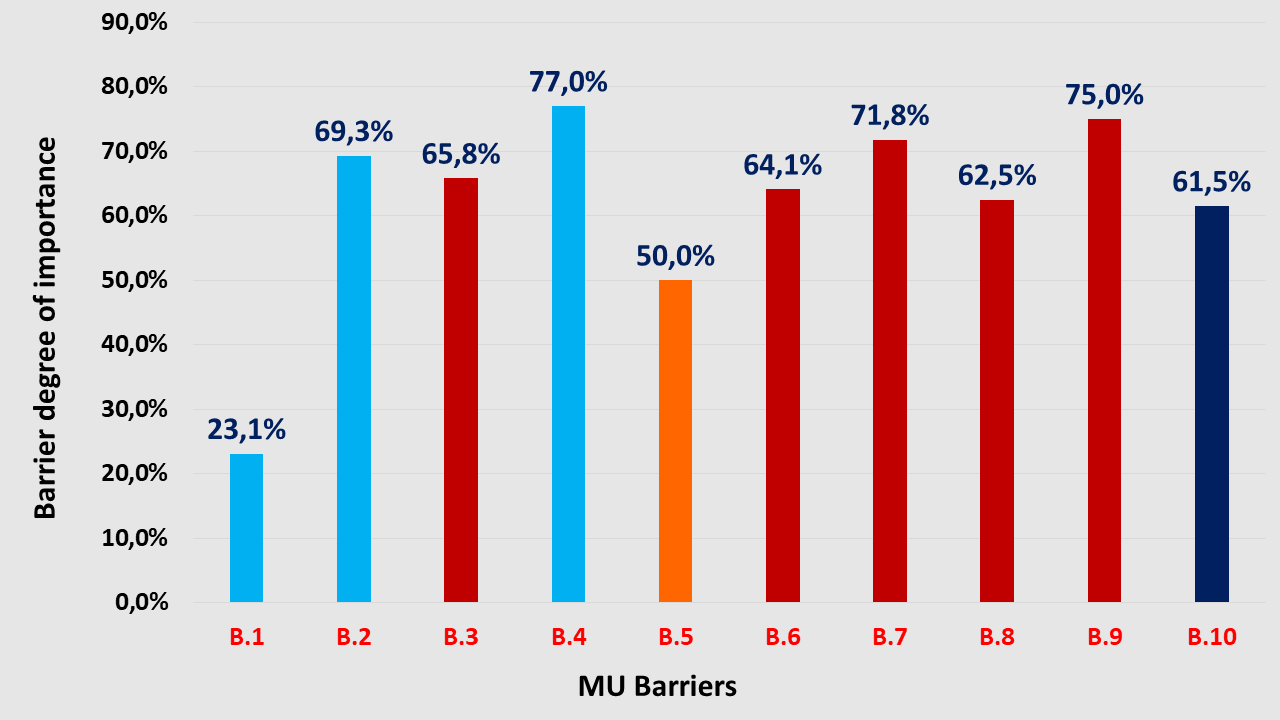** | **Barriers to Fisheries-Tourism-Nature Conservation MU in Greece**  **B.1** Low attraction of special groups of tourists (e.g vegetarian/vegan or other similar groups) **(S)**  **B.2** Lack of training programmes for fishing and traditional shipbuilding **(S)**  **B.3** Inability of public authorities to support local entrepreneurship in coastal/insular areas **(P)**  **B.4** Lack of entrepreneurial culture **(S)**  **B.5** High seasonality of fishing tourism activities **(Ec)**  **B.6** EU and national compensations to fishers for destructing their traditional vessels and quitting their fishing activities **(P).**  **B.7**Equity to taxation of traditional boats and modern, higher speed yachts of similar length **(P).**  **B.8** Further delays in the physical and economic completion of C.L.L.D. and the relevant OP measures on fishery for the period 2014-2020 **(P).**  **B.9** Deficiencies of the existing regulatory framework for the development of fishing tourism in inland waters where fisheries is the main income source **(P).**  **B.10** Ageing of the Greek fishing vessels **(T).**  **S=Social, Ec=Economic, P=Political, Env=Environmental, T=Technological** |
| --- | --- |
