# Supplementary material for: Fostering Spatial Efficiency in the Marine Space, in a Socially Sustainable Way: Lessons Learnt From a Soft Multi-Use Assessment in the Mediterranean
Source: Frontiers journal article supplement (doi:10.3389/fmars.2021.613721), 2021-03-22
Supplement: Table_4.docx [file Table_4.docx]

| **Table 4.** Results of D.A.B.I. Analysis, **Impacts**  **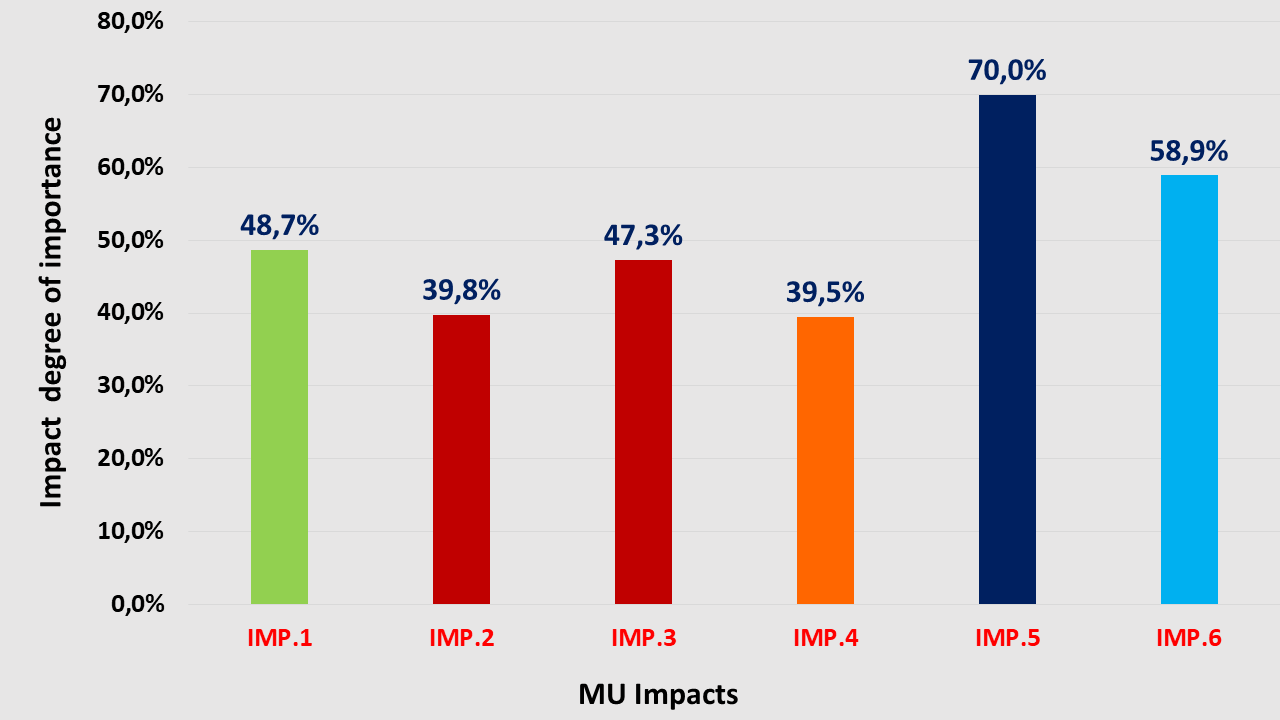** | **Impacts of Fisheries-Tourism-Nature Conservation MU in Greece**  **IMP.1** Environmental pollution/marine rubbish created by tourism activities (by non-informed tourists, etc.) **(Env)**  **IMP.2** Risk for fishers to lose compensation related to missed opportunities of fishing activities **(P).**  **IMP.3** Additional taxation for tourism activities, which makes the coexistence of fishing and tourism activities a non-viable business activity **(P).**  **IMP.4** Potentially increased competition by other professional groups (e.g. other local coastal tourism enterprises) **(Ec)**  **IMP.5** High investment costs for adapting the existing vessels to the requirements of tourism activities (following the existing legal provisions) **(T).**  **IMP.6** Risk of low tourist satisfaction due to the ageing and low educational level of fishers and the lack of specialization of on-board workers **(S).**  **S=Social, Ec=Economic, P=Political, Env=Environmental, T=Technological** |
| --- | --- |
