# Supplementary material for: Fostering Spatial Efficiency in the Marine Space, in a Socially Sustainable Way: Lessons Learnt From a Soft Multi-Use Assessment in the Mediterranean
Source: Frontiers journal article supplement (doi:10.3389/fmars.2021.613721), 2021-03-22
Supplement: Table_5.docx [file Table_5.docx]

**Table 5. Drivers:**Factors supporting and facilitating MU development in Fisheries-Tourism-Nature Conservation

|  |  | **1** | **2** | **3** | **4** | **5** | **SUM** | **1**  **%** | **2**  **%** | **3**  **%** | **4**  **%** | **5**  **%** | **(4+5)**  **%** |
| --- | --- | --- | --- | --- | --- | --- | --- | --- | --- | --- | --- | --- | --- |
| **Env** | Reduction of traditional fishing activities as a means to deal with overfishing (Env). | 3 | 8 | 9 | 13 | 7 | 40 | *7.5* | *20.0* | *22.5* | *32.5* | *17.5* | *50.0* |
| **Env** | Environmental education/sensitisation to fishery and tourism within or close to marine protected areas (Env). | 1 | 3 | 6 | 13 | 17 | 40 | *2.5%* | *7.5* | *15.0* | *32.5* | *42.5* | *75.0* |
| **T** | Familiarisation of fishers and their families with the internet and all related electronic services (pescatourism platforms, etc.) (T) | 4 | 2 | 11 | 11 | 12 | 40 | *10.0* | *5.0* | *27.5* | *27.5* | *30.0* | *57.5* |
| **T** | Incorporation of innovation in fishing activities (T). | 1 | 4 | 11 | 13 | 11 | 40 | *2.5* | *10.0* | *27.5* | *32.5* | *27.5* | *60.0* |
| **T** | Establishment of infrastructures for retail sales in port areas and in fishing shelters in tourist areas (as provided for by the existing framework, as is the case for example in Varkiza, Attica, or on Mykonos) (T). | 1 | 5 | 11 | 13 | 10 | 40 | *2.5* | *12.5* | *27.5* | *32.5* | *25.0* | *57.5* |
| **Ec** | Support of joint marketing actions with other tourist destinations in the same area, which can result in mutual profits (Ec). | 2 | 1 | 4 | 19 | 14 | 40 | *5.0* | *2.5* | *10.0* | *47.5* | *35.0* | *82.5* |
| **S** | Event organisation for the country’s fishing tradition (e.g. fishing tradition days, celebration of sardines, etc.) (S). | 1 | 1 | 6 | 13 | 19 | 40 | *2.5* | *2.5* | *17.5* | *32.5* | *47.5* | *80.0* |
| **Ec** | Fishers can benefit from EU funds directed to cultural fishery, including projects based on tourism within the EMFF framework (Ec) | 1 | 1 | 7 | 13 | 18 | 40 | *2.5* | *2.5* | *17.5* | *32.5* | *45.0* | *77.5* |
| **Ec** | Ability to create a mix of three features: fisheries – tourism – environmental protection within or close to marine protected areas (Ec). | 2 | 1 | 6 | 12 | 19 | 40 | *5.0* | *2.5* | *15.0* | *30.0* | *47.5* | *77.5* |
| **P** | State financial support for the further differentiation of the fisherman’s profession and the establishment of a temporary suspension of fishing activities (P). | 2 | 1 | 14 | 13 | 10 | 40 | *5.0* | *2.5* | *35.0* | *32.5* | *25.0* | *57.5* |
| **P** | Amendment of the existing regulatory framework in order to provide the opportunity to fishers to expand their tourism activities beyond a mere embarkation and transfer of tourists on small-scale fishing boats for entertainment and cultural purposes (P). | 3 | 1 | 8 | 13 | 15 | 40 | *7.5* | *2.5* | *20.0* | *32.5* | *37.5* | *70.0* |
| **S** | Fishers’ participation in planning and decision-making processes related to coastal and marine areas (S). | 1 | 3 | 4 | 18 | 14 | 40 | *2.5* | *7.5* | *10.3* | *45.0* | *35.0* | *80.0* |

**Source:** Online Survey

*1-absent, 2-not relevant, 3-low priority, 4-very important, 5-extremely important.*
