# Supplementary material for: Fostering Spatial Efficiency in the Marine Space, in a Socially Sustainable Way: Lessons Learnt From a Soft Multi-Use Assessment in the Mediterranean
Source: Frontiers journal article supplement (doi:10.3389/fmars.2021.613721), 2021-03-22
Supplement: Table_6.docx [file Table_6.docx]

**Table 6. Added Values:**Positive effects/impacts (advantages) of MU implementation in Fisheries-Tourism-Nature Conservation

|  |  | **1** | **2** | **3** | **4** | **5** | **SUM** | **1**  **%** | **2**  **%** | **3**  **%** | **4**  **%** | **5**  **%** | **(4+5)**  **%** |
| --- | --- | --- | --- | --- | --- | --- | --- | --- | --- | --- | --- | --- | --- |
| **Ec** | Differentiation of traditional fishing activities and increase of fishers’ income (Ec). | 0 | 3 | 3 | 14 | 20 | 40 | *0.0* | *7.5* | *7.5* | *35.0* | *50.0* | *85.0* |
| **Env** | Ability – opportunity to allow the already reduced fish stocks to rebuild / recover by reducing fishing efforts (Env). | 3 | 6 | 12 | 11 | 8 | 40 | *7.5* | *15.0* | *30.0* | *27.5* | *20.0* | *47.5* |
| **S** | Increase of employment and social coherence in coastal and insular communities depending on fishing activities (S). | 1 | 1 | 4 | 16 | 18 | 40 | *2.5* | *2.5* | *12.5* | *32.5* | *50.0* | *82.5* |
| **Ec** | Maintaining young generation in the fishing profession (Ec). | 3 | 2 | 9 | 10 | 16 | 40 | *7.5* | *5.0* | *22.5* | *25.0* | *40.0* | *65.0* |
| **Ec** | Attraction of visitors seeking authentic experiences - development of niche tourism markets (Ec). | 1 | 1 | 5 | 13 | 20 | 40 | *2.5* | *2.5* | *12.5* | *32.5* | *50.0* | *82.5* |
| **S** | Fishers play a major role in safeguarding and promoting their cultural identity (S). | 1 | 3 | 6 | 16 | 14 | 40 | *2.5* | *7.5* | *15.0* | *40.0* | *35.0* | *75.0* |
| **Ec** | Promotion of known local agricultural products (Ec). | 1 | 2 | 7 | 11 | 19 | 40 | *2.5* | *5.0* | *17.5* | *27.5* | *47.5* | *75.0* |
| **Env** | Awareness raising of tourists to environmental issues related to fisheries that threaten the seas (e.g. ghost fishing) (Env). | 1 | 2 | 3 | 19 | 15 | 40 | *2.5* | *5.0* | *7.5* | *47.5* | *37.5* | *85.0* |
| **Env** | Further involvement of small-scale fishing vessels in environmental activities (Env). | 2 | 4 | 5 | 17 | 10 | 38 | *5.3* | *10.5* | *13.2* | *44.7* | *26.3* | *71.0* |

**Source:** Online Survey

*1-absent, 2-not relevant, 3-low added value, 4-very important added value, 5-extremely important added value.*
