# Supplementary material for: Fostering Spatial Efficiency in the Marine Space, in a Socially Sustainable Way: Lessons Learnt From a Soft Multi-Use Assessment in the Mediterranean
Source: Frontiers journal article supplement (doi:10.3389/fmars.2021.613721), 2021-03-22
Supplement: Table_7.docx [file Table_7.docx]

**Table 7. Barriers:** Factors hindering (disadvantages) MU development in Fisheries-Tourism-Nature Conservation

|  |  | **1** | **2** | **3** | **4** | **5** | **SUM** | **1**  **%** | **2**  **%** | **3**  **%** | **4**  **%** | **5**  **%** | **(4+5)** |
| --- | --- | --- | --- | --- | --- | --- | --- | --- | --- | --- | --- | --- | --- |
| **S** | Low attraction of tourists belonging to special vegetarian/vegan or other similar groups (S) | 13 | 10 | 7 | 9 | 0 | 38 | *33.3* | *25.6* | *17.9* | *23.1* | *0.0* | *23.1* |
| **S** | Lack of training programmes for fishing and traditional shipbuilding (S) | 2 | 2 | 8 | 15 | 12 | 39 | *5.1* | *5.1* | *20.5* | *38.5* | *30.8* | *69.3* |
| **P** | Lack of public authorities to support local entrepreneurship in coastal/insular areas (P) | 4 | 4 | 5 | 13 | 12 | 38 | *10.5* | *10.5* | *13.2* | *34.2* | *31.6* | *65.8* |
| **S** | Lack of business culture (S) | 4 | 1 | 4 | 15 | 15 | 39 | *10.3* | *2.6* | *10.3* | *38.5* | *38.5* | *77.0* |
| **Ec** | Short duration/period of fishing tourism activities (Ec) | 6 | 5 | 8 | 17 | 2 | 38 | *15.8* | *13.2* | *21.1* | *44.7* | *5.3* | *50.0* |
| **P** | EU and national compensations to fishers for destructing their boats and quitting their fishing activities (P). | 2 | 3 | 9 | 12 | 13 | 39 | *5.1* | *7.7* | *23.1* | *30.8* | *33.3* | *64.1* |
| **P** | Equation of the taxation of traditional boats with modern, faster yachts of similar length (P). | 1 | 3 | 7 | 15 | 13 | 39 | *2.6* | *7.7* | *17.9* | *38.5* | *33.3* | *71.8* |
| **Ec** | Further delays in the physical and economic completion of C.L.L.D. and the relevant Operational Programmes on fishery for the period 2014-2020 (P). | 0 | 2 | 13 | 15 | 10 | 40 | *0.0* | *5.0* | *32.5* | *37.5* | *25.0* | *62.5* |
| **P** | Deficiencies of an existing regulatory framework for the development of fishing tourism in inland waters where fishery is the main income source (P). | 1 | 3 | 6 | 17 | 13 | 40 | *2.5* | *7.5* | *15.0* | *42.5* | *32.5* | *75.0* |
| **S** | Ageing of the Greek fishing boats (S). | 4 | 3 | 8 | 14 | 10 | 39 | *10.3* | *7.7* | *20.5* | *35.9* | *25.6* | *61.5* |

**Source:** Online Survey

*1-absent, 2-not relevant, 3-low obstacle, 4-very important obstacle, 5-extremely important obstacle.*
